1 **Membrane interactions and uncoating of Aichi virus, a**  
2 **picornavirus that lacks a VP4**

3

4

5 James T. Kelly <sup>a</sup>, Jessica Swanson <sup>a,b</sup>, Joseph Newman <sup>a</sup>, Elisabetta Groppelli <sup>c</sup>, Nicola J. Stonehouse <sup>b</sup>,  
6 Tobias J. Tuthill <sup>a\*</sup>

7

8 <sup>a</sup> The Pirbright Institute, Ash Road, Pirbright, GU24 0NF, UK

9 <sup>b</sup> School of Molecular and Cellular Biology, Faculty of Biological Sciences and Astbury Centre for  
10 Structural Molecular Biology, University of Leeds, Leeds, LS2 9JT, UK

11 <sup>c</sup> Institute for Infection and Immunity, St. George's University of London, Tooting, London, SW17 0RE,  
12 UK

13 \*Corresponding author

14 Email: [toby.tuthill@pirbright.ac.uk](mailto:toby.tuthill@pirbright.ac.uk)

15

16 Keywords: Aichi virus, Kobuvirus, Picornavirus, VP4, VP0, uncoating, pore formation, viroporin

17

## 18 **Abstract**

19 **Kobuviruses are an unusual and poorly characterised genus within the picornavirus family, and**  
20 **can cause gastrointestinal enteric disease in humans, livestock and pets. The human Kobuvirus,**  
21 **Aichi virus (AiV) can cause severe gastroenteritis and deaths in children below the age of five**  
22 **years, however this is a very rare occurrence. During the assembly of most picornaviruses (e.g.**  
23 **poliovirus, rhinovirus and foot-and-mouth disease virus), the capsid precursor protein VP0 is**  
24 **cleaved into VP4 and VP2. However, Kobuviruses retain an uncleaved VP0. From studies with**  
25 **other picornaviruses, it is known that VP4 performs the essential function of pore formation in**  
26 **membranes, which facilitates transfer of the viral genome across the endosomal membrane and**  
27 **into the cytoplasm for replication. Here, we employ genome exposure and membrane interaction**  
28 **assays to demonstrate that pH plays a critical role in AiV uncoating and membrane interactions.**  
29 **We demonstrate that incubation at low pH alters the exposure of hydrophobic residues within**  
30 **the capsid, enhances genome exposure and enhances permeabilisation of model membranes.**  
31 **Furthermore, using peptides we demonstrate that the N-terminus of VP0 mediates membrane**  
32 **pore formation in model membranes, indicating that this plays an analogous function to VP4.**

## 33 **Importance**

34 **To initiate infection, viruses must enter a host cell and deliver their genome into the appropriate**  
35 **location. The picornavirus family of small non-enveloped RNA viruses includes significant human**  
36 **and animal pathogens and are also models to understand the process of cell entry. Most**  
37 **picornavirus capsids contain the internal protein VP4, generated from cleavage of a VP0**  
38 **precursor. During entry, VP4 is released from the capsid. In enteroviruses this forms a membrane**  
39 **pore, which facilitates genome release into the cytoplasm. Due to high levels of sequence**  
40 **similarity, it is expected to play the same role for other picornaviruses. Some picornaviruses, such**  
41 **as Aichi virus, retain an intact VP0, and it is unknown how these viruses re-arrange their capsids**  
42 **and induce membrane permeability in the absence of VP4. Here we have used Aichi virus as a**  
43 **model VP0 virus to test for conservation of function between VP0 and VP4. This could enhance**  
44 **understanding of pore function and lead to development of novel therapeutic agents that block**  
45 **entry.**

46

## 47 **Introduction**

48

49 For many non-enveloped viruses, replication depends on the capsid first binding a receptor to trigger  
50 uptake into a cell via endocytosis. During entry the virus must deliver its RNA genome into the  
51 cytoplasm. Mechanisms of delivery are not well understood, but the proposed mechanism in  
52 picornaviruses (such as poliovirus (PV) and human rhinoviruses (RV), involves capsid structural  
53 rearrangements that enable the virus to interact with the endosomal membrane and form a pore. The  
54 capsid then uncoats, releasing its genome through the pore, across the endosomal membrane and into  
55 the cytoplasm. In many picornaviruses and picorna-like viruses, viral capsid protein VP4 is a small  
56 internal component of the capsid that is released during cell entry to initiate pore formation (1–7). VP4  
57 is formed from the cleavage of capsid protein VP0 into VP2 and VP4 (8–10). However, certain  
58 picornavirus do not undergo VP0 cleavage, therefore do not possess a VP4 protein, and it is unknown  
59 what component of the capsid performs the normal function of VP4.

60 The best characterised picornavirus genera that possess uncleaved VP0 are Kobuviruses and  
61 parechoviruses. Kobuviruses are associated with cases of acute gastroenteritis in people, livestock and  
62 pets (11–14), including the best studied member, the human pathogen Aichi virus (AiV). The virus is  
63 wide-spread, with 80% to 95% of adults reportedly having antibodies against the virus (15–17). AiV is  
64 generally asymptomatic, however it can cause mild gastrointestinal upset and there have even been fatal  
65 cases reported in children under five, especially in developing countries (14, 18–20).

66 Picornavirus particles consist of a single positive sense RNA genome, within a non-enveloped capsid  
67 composed of 60 copies of four structural proteins, VP1, VP2, VP3 and VP4 arranged in pseudo T=3  
68 icosahedral symmetry. In the majority of picornaviruses, VP2 and VP4 are derived from a precursor  
69 called VP0, which undergoes a maturation cleavage to form VP2 and VP4 (e.g. enteroviruses,  
70 aphthoviruses, cardioviruses and hepatoviruses), this is thought to be triggered by RNA encapsidation  
71 in some viruses (8–10, 21). However for the Kobuvirus and parechovirus genera, VP0 does not cleave  
72 and the mature capsid contains an intact VP0 (22, 23). In VP4-containing viruses, VP4 is usually  
73 myristoylated and by using specific inhibitors or mutagenesis of a myristoylation signal sequence to  
74 prevent myristoylation, it has been shown to play a critical role in virus assembly and entry (24–27).  
75 The N-terminus of Kobuvirus VP0, but not parechovirus VP0 is myristoylated (22, 28), however,  
76 myristoylation seems unlikely to play an essential role as the specific inhibitors are unable to restrict  
77 infection by these viruses (28). Uncoating has been extensively studied in VP4-containing  
78 picornaviruses, especially enteroviruses (e.g. PV, RV). However, there are few studies on uncoating in  
79 VP0 containing viruses and no studies have been reported on the role of VP0 in uncoating, although it  
80 is assumed that the N-terminus of VP0 may be involved in pore formation as this is in an analogous  
81 location to VP4.

82 In order to uncoat and form a pore within the endosomal membrane, viral capsids must undergo  
83 extensive structural rearrangements. Experimental and structural studies of different types of  
84 picornavirus particles have given great insights into the structural rearrangements that occur during  
85 uncoating of VP4-containing picornaviruses (29–37). The trigger varies between viruses, for  
86 aphthoviruses these changes can be initiated solely by exposure to low pH (38, 39) while for major  
87 group RV receptor interactions in combination with endosomal acidification are required (40–43). AiV  
88 capsids are known to be destabilised by low pH, and therefore endosomal acidification may play a role  
89 in AiV uncoating (44).

90 Studies with enterovirus particles have shown that these viruses are able to bind to and permeabilise  
91 membranes, during a process known as capsid breathing (2, 45). Studies using intact virions, peptides  
92 of VP1-N and VP4 and antibodies raised against VP1-N and VP4, in conjunction with membrane  
93 binding and pore formation assays revealed the N-terminus of VP1 is involved in attaching the  
94 enterovirus capsid to the membrane and VP4 is involved in pore formation (7, 45–47). We have shown  
95 that recombinant VP4 and VP4-peptides of rhinovirus 16 (RV16) form size selective pores in model  
96 membranes consistent with the size of a single strand of RNA to pass thorough (2, 7). Furthermore,  
97 mutation of residue T28 in PV VP4 can reduce the capsids ability to permeabilise model membranes  
98 (5). In combination with this biophysical data, structural studies have helped develop a model for  
99 enterovirus uncoating. Incubation of enterovirus particles with their receptor or heating past  
100 physiological temperature, can trigger mature particles to uncoat into uncoating intermediate particles  
101 (Altered particles/A-particles) or empty particles (30). A-particles still contain the viral genome, but  
102 the capsid has undergone expansion and structural rearrangements, including VP4 release and  
103 externalisation of N-terminus of VP1, whereas empty particles have released their genome and  
104 undergone further structural rearrangements (29–37). Biophysical and structural data of PV in the  
105 presence of model membranes indicate that VP4 and the N-terminus of VP1 together may form an  
106 ‘umbilicus’ which tethers the virus to the endosomal membrane (46, 48).

107 Unlike enteroviruses, the aphthoviruses and cardioviruses do not produce stable empty capsids during  
108 uncoating *in vitro*. The aphthoviruses foot-and-mouth disease virus (FMDV) and equine rhinitis A virus  
109 (ERAV), disassemble into pentamers almost instantly after exposure to a pH critical for uncoating.  
110 Exposure to heat also induces disassembly. An uncoating intermediate/empty particle structure has been  
111 solved for ERAV from crystals grown at low pH (38). From this it was observed that VP4 is completely  
112 released from the capsid and the N-terminus of VP2 may be externalised from the capsid, rather than  
113 VP1 as in enteroviruses. Due to this, it is hypothesised that the N-terminus of VP2 will be involved in  
114 endosomal tethering in aphthoviruses (38). Similarly, cardioviruses also do not produce stable empty  
115 particles, for example, heating of Saffold virus 3 to 42 °C for 5 minutes induces particle disassembly,  
116 however exposure for 2 minutes induces a mixture of empty and A-particles (49). A low resolution  
117 cryo-EM structure of the A-particles, shows the particles have expanded, released VP4 and that there is

118 an unconnected density leaving the particle that might be the VP1 N-terminal arm (49). To summarise,  
119 the capsid rearrangements that occur in VP4-containing picornaviruses, involve capsid expansion,  
120 release of VP4 and externalisation of the N-terminus of either VP1 or VP2.

121 However, less is known about uncoating in VP0-containing picornaviruses. To date AiV is the only  
122 VP0-containing picornavirus for which an empty capsid structure has been determined. Cryo-EM  
123 structures of mature and empty AiV capsids produced by heating revealed that in the empty particle the  
124 N-terminus of VP0 and VP1 become disordered, however no proteins were observed to be released or  
125 externalised (50). This differs to what is known about VP4-containing picornaviruses, where VP4 is  
126 released and the N-terminus of either VP2 or VP1 becomes externalised. It is difficult to envisage a  
127 model for membrane interactions in which capsid proteins are not externalised. For AiV, it was  
128 proposed that during uncoating, capsid proteins become externalised but slide back inside the capsid  
129 after genome release (50). However, whether this observation is biologically relevant remains to be  
130 resolved, as it seems unlikely that capsid proteins could easily be re-internalised if they are inserted  
131 within a membrane.

132 In this study the mechanism of AiV uncoating is analysed using purified virus particles and a VP0  
133 peptide. Using chemical inhibition assays, capsid stability assays and liposome assays with purified  
134 virus we show that acidification is essential for AiV entry and that uncoating and membrane interactions  
135 are also dependent on low pH. Using peptides in liposome assays we also show that the N-terminus of  
136 AiV VP0 plays an equivalent role to that seen in the VP4 proteins of other picornaviruses. Sequence  
137 alignments suggest this function may be conserved between all Kobuviruses.

138

## 139 **Results**

140

### 141 **AiV endocytosis is dependent on endosome acidification**

142

143 AiV capsids, in common with those of many other picornaviruses are destabilised by low pH (51),  
144 suggesting that endosomal acidification may be a trigger for AiV uncoating. To test if endosome  
145 acidification was required for AiV entry, the virus was grown in the presence of the endosome  
146 acidification inhibitor  $\text{NH}_4\text{Cl}$  at a range of non-toxic concentrations. In untreated cultures or those  
147 treated with low concentrations (2 mM) of  $\text{NH}_4\text{Cl}$ , virus infection resulted in complete CPE at 20 hpi,  
148 with viral titres of  $2\text{-}3 \times 10^6$  pfu/ml. In contrast, in cultures treated with  $\text{NH}_4\text{Cl}$  at concentrations of 10  
149 mM and above, the addition of virus did not lead to visible CPE and AiV titres at 20 hpi were reduced  
150 by over 99% (Figure 1A)). A time of addition study was then carried out to determine at what point in  
151 the virus life cycle  $\text{NH}_4\text{Cl}$  was inhibitory. An inhibitory concentration of  $\text{NH}_4\text{Cl}$  was added every hour  
152 to a different well of AiV infected cells. This ranged from one hour prior to infection, to 4 hours post  
153 infection. This revealed that  $\text{NH}_4\text{Cl}$  was only inhibitory when added to cells prior to or during infection  
154 (Figure 1B). When added 1 hour post infection, little reduction in titre was observed and no reduction  
155 occurred when added 2 or more hours post infection (Figure 1B). This shows that  $\text{NH}_4\text{Cl}$  inhibits AiV  
156 infection during entry and not at another part of replication. This is consistent with the requirement for  
157 low pH for cell entry.

## 158 **Decreasing pH enhances capsid alterations**

159

160 Having shown that endosome acidification is important for AiV entry, we wanted to investigate the  
161 effect of pH on genome exposure and capsid protein dynamics. This was assessed using a particle  
162 stability thermal release assay (PaSTRy) assay, which has previously been used to study uncoating  
163 dynamics and particle stability of enteroviruses, FMDV and AiV (44, 52–55). To perform this, purified  
164 virus was incubated at a range of pH values with two dyes (SYTO9 and SYPRO orange). SYTO9 binds  
165 and fluoresces in the presence of nucleic acid, indicating genome accessibility. SYPRO orange binds  
166 and fluoresces in the presence of hydrophobic amino acid residues, indicating exposure of hydrophobic  
167 residues within the capsid proteins. During the assay, temperature was raised by 1 °C every 30 seconds  
168 and the level of fluorescence of each dye was measured.

169 Previous studies with PaSTRy established that low pH can promote AiV genome exposure to occur at  
170 lower temperatures (44). Here we have repeated this study using a finer range of pH values, between  
171 pH 7.0 and pH 4.9 (7.0, 6.2, 5.9, 5.6, 5.0 and 4.9), while also tracking the exposure of hydrophobic  
172 protein residues. Assays were performed after pre-incubating purified particles for 10 minutes at either  
173 room temperature, 56 °C or 59 °C, and were then chilled on ice for 2 minutes, prior to performing the  
174 assay.

175 With a room temperature pre-incubation, SYTO 9 fluorescence began to be detectable between 48 and  
176 49 °C for pH 7.0, 6.2 and 5.9 with maximal fluorescence occurring at 55 °C. At pH 5.6 these values  
177 were reduced to 45 and 54 °C respectively. At pH 5 the fluorescence started at 42 °C peaking at 51 °C  
178 and at pH 4.9 these values were reduced to 41 °C and 50 °C respectively (Figure 2A). This showed that  
179 incubation at lower pH reduces the temperature for RNA exposure. When experiments were repeated  
180 with samples pre-incubated at 56 °C, a greatly reduced peak signal was observed at pH 7.0 and no peak  
181 was observed at pH 5.0 (Figure 2 B). For samples pre-heated to 59 °C no SYTO9 peak was observed  
182 for samples (pH 7.0, 6.2, 5.6, 5.0 4.9) (Figure 2C).

183 Therefore, overall, as pH decreased, the exposure of nucleic acid appeared to occur at lower  
184 temperatures. Results from the pre-incubation at 56 °C indicate that low pH has enhanced genome  
185 release and not just exposure, as a peak being present at pH 7.0 but not pH 5.0 indicates that at pH 7.0  
186 some RNA remains within the capsid but at pH 5.0 it has been completely released.

187 The effect that different pH values had on the profile of hydrophobic protein dynamics as measured by  
188 fluorescence is more complex. For simplicity we have separated the profiles into three stages based on  
189 events occurring at specific temperatures (Figure 2D). Stage 1 (25-54 °C) for samples pre-incubated at  
190 room temperature is characterised by a trough at pH 7.0, 6.2, 5.9 and 5.6, the trough becomes  
191 increasingly shallow at lower pH values. At pH 5.0 no trough was observed and instead, the profile  
192 resembled a flat line, finally at pH 4.9 a peak was observed. The peak for the hydrophobic protein

193 fluorescence at pH 4.9 occurred 2 °C before the maximum peak of RNA exposure peak (Figure 2B).  
194 Stage 2 (54 to 62 °C) is characterised by a sloping shoulder at pH 7, at pH 6.2 and 5.9 the shoulder is  
195 flatter, at pH 5.6 and 5 it is almost indistinguishable from the trough in Stage 1 and at pH 4.9 it has  
196 become a distinct trough. The beginning of the Stage 2 coincides with maximum RNA exposure for pH  
197 7, 6.2 and 5.9. At Stage 3 (62 to 95 °C) a final large peak is observed in all conditions. The exact  
198 temperature that the peak occurs and its magnitude varies between different pH values, this likely  
199 represents protein denaturation and is not physiologically relevant. Profiles of AiV at pH 4.9 resemble  
200 PaSTRy assay previously observed for enteroviruses at neutral pH, however AiV profiles differ when  
201 incubated between pH 7.0 and 5.0 (53, 54). When samples were pre-incubated to 56 or 59 °C a flat line  
202 was observed at Stage 1 and Stage 2 but the final Stage 3 peak was still observed (Figure 2 E,F).

203 The experiments described here have shown that reductions in pH enhance genome release, alter capsid  
204 dynamics and increase exposure of hydrophobic capsid residues at lower temperatures. The observation  
205 that the signals for exposure of genome and hydrophobic residues was reduced after pre-heating at  
206 elevated temperatures indicates that the changes that occur during heating are irreversible.

207

## 208 **Membrane interactions and pore formation**

209

210 Having established that pH plays an important role in AiV uncoating, the effect of pH on the ability of  
211 AiV to permeabilise model membranes was investigated.

212 Purified AiV was incubated at a range of pH values with liposomes containing carboxyfluorescein (CF)  
213 dye at 37 °C. Florescent dye release was measured every minute for one hour. This revealed that AiV  
214 induces membrane permeabilisation in a pH dependent manner, with the rate of dye release increasing  
215 at lower pH values (Figure 3A). Dye release after one hour ranged from 12% at pH 7 to 90% at pH 4.9  
216 (Figure 3B).

217 In addition to increasing the rate of dye release, pH was also observed to change the profile of dye  
218 release curves. At pH 7.0, 6.2 and 5.9, AiV dye release curves were seen as a slope increasing at a  
219 steady constant rate, with the slope gradient increasing at the lower pH values. At pH 5.6, 5.0 and 4.9,  
220 there was an initial steady slope of release, before an exponential phase of release occurring at 20, 15  
221 and 10 minutes receptively, before this levelled off (Figure 3 A). We have also investigated size  
222 selectivity using a dextran release assay. Samples of purified virus were incubated for one hour at pH  
223 7.0 or pH 5.0 in the presence of liposomes containing FITC-labelled dextran of different sizes (4 kD  
224 (FD4), 10 kD (FD10), 70 kD (FD70) or 250 kD (FD250)) (Figure 3C-D). Release of dextrans was  
225 quantified by pelleting the liposomes and measuring the fluorescence in the supernatant. This revealed  
226 that AiV capsids preferentially released the two smallest dextrans (FD4 and FD10) and therefore



227 appeared to form a size selective pore, consistent with previous published results with RV16 (2). The  
228 predicted size of the pore is consistent with the size necessary to allow passage of unfolded single  
229 stranded RNA (2). The effect of dye release for FD4 and FD10 was significantly higher at pH 5.0,  
230 giving further evidence that AiV induced pore formation is enhanced by low pH.

231

232 We have previously shown that for another picornavirus in which cell entry is dependent on endosome  
233 acidification, (RV16) the ability of the virus to permeabilise membranes was increased at lower pH  
234 values (2). In this previous study, the profile of RV16 dye release curves differed from AiV dye releases  
235 curves in the current study. For RV16 there was a high rate of dye release initially and the curve gradient  
236 gradually reduced over time, incubation at different pH values affected the rate of release but the profile  
237 remained the same. This could represent differences in uncoating dynamics of AiV and RV16.

238

### 239 **The role of VP0 in membrane permeability and pore formation in AiV**

240

241 In other picornaviruses and picorna-like viruses, VP4 has been shown to be the component of the capsid  
242 that permeabilises membranes (1–7). For RV16, VP4 forms a size selective pore consistent with the  
243 size required for passage of single-stranded nucleic acid, specifically the first 45 amino acids are able  
244 to induce pore formation (7). Also residue 28 of PV has been shown to be involved with VP4 membrane  
245 permeability (5). In VP0 viruses such as AiV which do not undergo VP0 cleavage to form VP4 and  
246 VP2, it is hypothesised the N-terminus of VP0 will carry out this role. Given that the pore forming part  
247 of the enterovirus VP4 appears to be present in the first 45 amino acids, we investigated if there was  
248 conservation between VP4 sequences across the picornavirus family and if this was shared by VP0  
249 viruses. Alignments of VP4 from a variety of different genera was performed using Muscle alignment  
250 (56). Alignments indicated a high degree of similarity of the amino acid properties of different  
251 picornavirus genera in the N-terminus of VP4, especially in the region of amino acids 20 and 35 (Figure  
252 4A). This gives an indication that this region of VP4 may play a role in pore formation of all VP4  
253 picornaviruses, consistent with this region containing the amino acid at position 28 mentioned earlier.  
254 We predict that this conserved motif is important for pore formation. We went on to look for  
255 conservation in VP0 viruses, comparing the first 109 amino acids of VP0 viruses from multiple genera  
256 using a Muscle alignment, this produced two groups of sequences which we refer to as ‘Kobu-like’ and  
257 ‘parecho-like’. The alignment shows that ‘parecho-like’ viruses lack strong conservation in this area  
258 and any other area of VP0. This is in contrast to ‘Kobu-like’ viruses which have a high degree of  
259 conservation of amino acid properties in the first 20 amino acids of VP0 (figure 4B). Strong  
260 conservation can be indicative of an important and essential function. Therefore this may suggest that  
261 the conserved VP4 motif in VP4 viruses and the conserved N-terminus of VP0 in ‘Kobu-like’ viruses,

262 may have specific and essential functions. However, despite this conservation between VP4 sequences  
263 and between VP0 sequences, alignments between both VP4 and VP0 did not show obvious similarities  
264 (Data not shown). This suggests that there may be functional differences in how VP4 and VP0 interact  
265 with membranes.

266 To test if the N-terminus of VP0 from other picornaviruses were able to induce pore formation, CF  
267 liposome assays were carried out using peptides from representatives of both groups, using the first 50  
268 amino acids of AiV VP0 (AiV-VP0-N50) and the parechovirus, Ljungan virus (LV) VP0 (LV-VP0-  
269 N50) at pH 7. This revealed that AiV-VP0-N50 was able to induce dye release in a dose dependent  
270 manner, while LV-VP0-N50 was not (Figure 5 A-B). This is consistent with the VP0 sequences  
271 alignments where AiV and other ‘Kobu-like’ viruses show strong conservation in the N terminus of  
272 VP0, while LV and other ‘parecho-like’ viruses lack strong conservation in this area (Figure 5 A-B,  
273 Figure 4 B). The peptides used here were not myristoylated as it has previously been demonstrated that  
274 myristoylation is not essential for the replication of Kobuviruses and parechoviruses (28).

275 Although the AiV peptide was able to induce membrane permeability, this appeared to be at a lower  
276 level than previously observed for RV16 peptides (7). To test if there was indeed a difference in  
277 permeabilisation between RV16 and AiV peptides we performed the assays with the peptides in parallel.  
278 This revealed that AiV-VP0-N50 was less effective at inducing membrane permeability than an un-  
279 myristoylated RV16-VP4-N45 (Figure 5 C).

280 As it has been established that AiV-VP0-N50 is able to permeabilise membranes, its ability to form a  
281 size selective pore was compared with RV16 VP4 peptides, previously shown to form such a pore. To  
282 perform this AiV-VP0-N50 and RV16-VP4-N45 peptides were incubated for one hour at pH 7.0 in the  
283 presence of liposomes containing FITC-labelled dextrans of different sizes (4 kD (FD4), 10 kD (FD10),  
284 70 kD (FD70) or 250 kD (FD250)) (Figure 5D-E). Release of dextrans was quantified by pelleting the  
285 liposomes and measuring the fluorescence in the supernatant. This revealed that, like RV16 VP4 and  
286 AiV capsids, AiV VP0 preferentially releases the smallest dextran FD4 and therefore forms a size  
287 selective pore (2).

288 Next the ability of AiV-VP0-N50 to permeabilise membranes was compared between pH 7.0 and pH  
289 5.0. This revealed that pH 5.0 enhanced dye release of the peptide (Figure 5F). However, the dye release  
290 profiles at pH 5 differ between peptide and virus (Figure 5 F, Figure 3A). For the virus, a sharp increase  
291 followed by levelling off was observed, but for the peptide a constant gradual increase and no levelling  
292 was observed (Figure 5 C, Figure 3A).

## 293 Discussion

294

295 In this study we sought to investigate uncoating and membrane interactions in the VP0-containing  
296 picornavirus AiV. This virus is of particular interest given the paucity of studies which have investigated  
297 uncoating in VP0-containing viruses. We have demonstrated that the N-terminus of AiV VP0 is a pore  
298 forming unit of the capsid, indicating its function is likely analogous/similar to VP4 in VP4-containing  
299 picornaviruses. Also using a combination of stability assays, membrane permeability assays and  
300 chemical inhibition we have demonstrated that pH plays a critical role in AiV uncoating and membrane  
301 interactions.

302 Here we have shown AiV requires endosome acidification for entry and using PaSTRy we demonstrated  
303 incubation of AiV at a pH of 5.6 and below enhances AiV genome exposure and alters the exposure of  
304 hydrophobic capsid proteins, this corresponds with the pH of late endosomes. The changes in PaSTRy  
305 assay profile were enhanced as pH was lowered even further, with a very dramatic shift occurring  
306 between pH 5.0 and 4.9. At present we are unable to explain this dramatic difference in profile, when  
307 the pH differs by just 0.1. At pH 4.9, but no other pH, an increase in hydrophobic protein signal is  
308 detected a few degrees before nucleic acid signal is detected. These events are thought to represent  
309 genome release and the externalisation of internal capsid proteins. After maximum nucleic acid signal  
310 is detected, there is a large drop in hydrophobic signal causing a trough. This may indicate that during  
311 uncoating, internal capsid proteins are externalised and then re-internalised after genome release. This  
312 would be consistent with structural data of AiV empty particles produced by heating capsids at neutral  
313 pH, which reveal that VP1 and VP0 are inside the capsid after genome release, indicating they may be  
314 externalised during uncoating and become reinternalised after genome release (50). However, PaSTRy  
315 assays performed on particles pre-heated (so that genome release had already occurred) no-longer  
316 showed this trough. This indicates the capsid rearrangements that occur during or after genome release  
317 are irreversible and if proteins are re-internalised after genome release their externalisation can no  
318 longer be initiated by heating. Furthermore, the biological relevance/implications of this *in vitro*  
319 observation still remains to be addressed. If re-arranged capsid proteins were inserted into a membrane  
320 first, it would likely be more difficult for them to be removed from the membrane and reinternalised  
321 into the capsid, as previous structural data (50), along with our biochemical data suggests they do in the  
322 absence of membranes.

323 Whatever the biological relevance though, our PaSTRy results and previous structures highlight a  
324 difference *in vitro* between AiV and enterovirus uncoating. Enterovirus structures show that VP4 is  
325 completely released from the capsid and the externalised termini of VP1 remains externalised after  
326 genome release (29, 35–37). Previously published data for enteroviruses with PaSTRy assay is  
327 consistent with this, with no apparent hydrophobic protein trough occurring after the nucleic acid peak  
328 (53, 54).

329 In addition to enhancing uncoating, incubation at a more acidic pH also enhances the ability of AiV to  
330 permeabilise model membranes. When AiV is incubated at pH 7.0 it induces relatively low levels of  
331 dye release, reducing the pH to 6.2 and 5.9 caused a moderate increase in dye release. In PaSTRy assays  
332 these pH values did not affect genome exposure and had similar hydrophobic protein profiles to pH 7.0.  
333 When the pH is lowered to 5.6 and below, the rate of AiV induced dye release increases significantly  
334 before levelling off, this affect becomes more pronounced as the pH decreases further (Figure 3). These  
335 significant increases in dye release coincide with PaSTRy assay profiles with enhanced hydrophobic  
336 signal. This suggests that externalisation of hydrophobic capsid protein residues enhances AiV induced  
337 membrane permeabilisation, this is consistent with models of enterovirus induced membrane  
338 permeabilisation (45). The liposome assay profiles observed for AiV differs from what we have seen  
339 previously for the enterovirus RV16. For RV16, particles were able to induce dye release at neutral pH,  
340 dye release was enhanced at low pH but it increased the rate of release gradually, rather than a sudden  
341 increase in release and then levelling off which we observed for AiV (2). This may indicate that low  
342 pH plays a more critical role in AiV particle alterations and membrane interactions than for RV16.

343 Given that incubation of AiV at low pH increases the level of hydrophobic protein residues detected in  
344 PaSTRy and enhances membrane interactions, it is likely that low pH induces externalisation of capsid  
345 components essential for AiV membrane interactions. It might therefore be expected that free peptide  
346 would induce higher levels of membrane permeability at physiological pH than virus. However, this  
347 was not observed, VP0-N-50 peptide at 0.5  $\mu$ M induced lower amounts of dye release than virus  
348 containing the equivalent of 0.1  $\mu$ M of VP0-N-50 at pH 7.0 and pH 5.0. As free peptide is less efficient  
349 at inducing membrane permeability than the virus, this indicates that either additional components of  
350 the capsid are also involved in membrane permeabilisation or that VP0 N must be physically attached  
351 to the capsid to maintain its optimal pore forming conformation. Low pH also enhances the ability of  
352 the VP0-N-50 peptide to form a pore, this is not surprising given that this would be the natural  
353 environment that it would be required to form a pore in. This is consistent with observations that the  
354 ability of RV16 VP4 protein induce pore formation is enhanced at acidic pH (2).

355 Furthermore, using an N-terminal peptide of AiV VP0, we demonstrated VP0 forms a size-selective  
356 pore in model membranes consistent with a pore size able to release a molecule of single stranded RNA.  
357 This demonstrates the N-terminus of AiV VP0 plays an analogous function to VP4 of other  
358 picornaviruses in terms of membrane permeabilisation (1–6). However, the N-terminus of VP0 does  
359 not appear to be the pore-forming component of all VP0-containing picornaviruses, as an N-terminal  
360 peptide for LV, did not induce dye release from liposomes.

361 Sequence comparison of VP0 N-termini reveal that the VP0-N termini of AiV and other ‘Kobu-like’  
362 VP0 viruses are well conserved, this suggests that the N-terminus of VP0 likely plays a pore forming  
363 role for all ‘Kobu-like’ VP0 viruses. Similar levels of homology are seen between VP4 sequences in

364 other picornavirus genera. However, comparison of LV and other ‘parecho-like’ VP0 viruses revealed  
365 that VP0 N-termini are not well conserved, this would be consistent with it not being involved in  
366 membrane interactions in these viruses. Taken together, this seems to indicate that the N-terminus of  
367 the VP0 of viruses in ‘Kobu-like’ viruses possess the ability to form a pore, whilst the ‘parecho-like’  
368 group lack N-terminal membrane permeabilisation activity.

369 The ability of other AiV proteins to interact with membranes is yet to be determined. For enteroviruses,  
370 it has been demonstrated that the N-terminus of VP1 is essential for attachment to model membranes in  
371 flotation assays. The N-terminus of VP1 is internal in native particles and is released during conversion  
372 to A-particles. It was shown that in flotation assays, A-particles bound to model membranes, while  
373 native particles and A-Particles where VP1 N-terminus had been cleaved by proteolytic digestion were  
374 unable to bind model membranes (30). Furthermore, when A-particles bound to model membranes were  
375 subjected to proteolytic digestion, the N-terminus of VP1 remained within the membranes (30). Further  
376 demonstrating that VP1 is required for membrane attachment in enteroviruses (30). If consistent with  
377 enteroviruses, the AiV N-terminus of VP1 will become externalised and be involved in attachment to  
378 the endosomal membrane. However, unlike in VP4-containing-picornaviruses, AiV VP0 remains  
379 attached to the capsid, so it is possible that it may play an important role in attachment alongside or  
380 instead of VP1.

## 381 **Conclusion**

382 This study is the first to characterise effects of pH on the uncoating and membrane interactions of a  
383 VP0-containing picornavirus. We have shown that the N-terminus of VP0 can play a role in pore  
384 formation but not in all VP0-containing-picornaviruses. We have also demonstrated that AiV behaves  
385 differently in functional uncoating assays compared to enteroviruses. Together with previous structural  
386 studies this indicates that AiV capsids likely undergo different structural changes in the capsid to initiate  
387 membrane interactions and uncoating than VP4-containing-picornaviruses. AiV also appears to have a  
388 greater dependence on pH to facilitate externalisation of membrane interacting components than  
389 enteroviruses. Further characterisation will be required to determine the exact uncoating mechanism of  
390 AiV.

## 391 **Materials and Methods**

392

### 393 **Cell lines and virus**

394 Vero cells were obtained from the Central Services Unit at The Pirbright institute and propagated in  
395 DMEM containing 10% fetal bovine serum (FBS) and 50 µg/ml penicillin and streptomycin at 37° C in  
396 a humidified atmosphere containing 5% CO<sub>2</sub>. AiV strain A846/88 (GenBank no. BAA31356.1) was  
397 obtained from Prof David Stuart and Dr Elizabeth Fry at the University of Oxford. Virus was propagated  
398 by inoculating Vero cells at MOI 1 and incubating at 37 °C in a humidified atmosphere containing 5%  
399 CO<sub>2</sub> for 24 hours before the supernatant was harvested.

### 400 **Peptides**

401 Peptides were synthesised by Peptide Protein Research Ltd using the PeptideSynthetics service. The  
402 sequences were;

403 AiV-VP0-50N: GNSVTNIYGNGNNVTTDVGANGWAPT VSTGLGDGPVSASADSLPGRSGGA

404 LV-VP0-50N: MAASKMNPVGNLLSTVSSTVGSLLQNPSVEEKEMDSRVAASTTTNAGNL

405 RV16-VP4-45N: MGAQVSRQNVGTHSTQNMVSNSSINYNINYNFKDAASSGASRLD

### 406 **Chemical inhibition**

407 Vero cells were seeded into a 6-well plate at 3x10<sup>5</sup> cells in 2 ml of 10 % FBS-DMEM per well and  
408 incubated at 37 °C overnight. Medium was removed from the wells and the cells were pre-treated with  
409 media containing NH<sub>4</sub>Cl (ammonium chloride) (Sigma-Aldrich) (2, 10, 20, 40 mM), for 2 hours at 37  
410 °C. Cells were then incubated on ice with virus to allow attachment (MOI = 1) for 30 minutes in the  
411 presence of inhibitor. Unbound virus were removed, and cells were washed with PBS, before adding 2  
412 ml of warm serum-free DMEM containing inhibitor to the wells. For time of addition studies cells were  
413 infected with AiV at MOI 1 and media was replaced with 40 mM of NH<sub>4</sub>Cl at with 0, 1, 2, 3 or 4 hours  
414 post infection. After incubation overnight at 37 °C for 20 hours the supernatants were harvested and  
415 the virus titres determined by plaque assay.

### 416 **Plaque assay**

417 Six well plates were seeded with 3x10<sup>5</sup> Vero cells per well. The following day AiV samples to be  
418 titrated was serially diluted in serum-containing medium. Media was removed from wells and 200 µl  
419 of each serial dilution were added to individual wells and incubated for 2 hours. After 2 hours,  
420 supernatant was removed and 2 ml of serum-containing medium with 1% agarose at 42 °C was added  
421 to each well and allowed to solidify. Plates were incubated at 37 °C in a humidified atmosphere  
422 containing 5% CO<sub>2</sub> for 72 hours. Monolayers were fixed and stained with 1 ml of 4% formaldehyde,



423 1% crystal violet, 20 % ethanol in PBS, plaques counted and titre expressed as PFU/ml of starting  
424 material.

#### 425 **Purification of virus**

426 Infected cell cultures were lysed by addition of NP40 to make the solution a final concentration of 0.5%  
427 NP40 and freeze-thawing three times. Lysates were incubated for 3 hours at 37 °C in the presence of  
428 DNase (10 µM) and clarified by centrifugation. Clarified supernatants were concentrated by  
429 precipitation with 8% PEG 8000 overnight and centrifugation at 100,000 RCF for 1 hour. The resulting  
430 pellet was resuspended in PBS, pelleted through a 2 ml cushion of 30% (w/v) sucrose in PBS at 125,755  
431 RCF for 2 hours, resuspended in PBS and subjected to sedimentation in a sucrose density gradient  
432 comprising 15–45% (w/v) sucrose in PBS at 237,000 RCF for 50 minutes. Sucrose gradients were  
433 fractionated and purified virus was quantified by absorbance at 260 nm. Sucrose was removed using a  
434 Zeba column (ThermoFisher Scientific) following the manufacturer's instructions.

#### 435 **Particle Stability Thermal Release Assay (PaSTRy)**

436 Virus particle alterations were characterized by a thermofluorometric dual dye-binding assay using  
437 the nucleic acid dye SYTO9 and the protein-binding dye SYPRO orange (both from Invitrogen).  
438 Reaction mixtures of 50 µl containing 1.0 µg of purified virus, and 0.1M Citric acid 0.2M Sodium  
439 phosphate dibasic buffer at either pH 7, 6.2, 5.9, 5.6, 5.0 or 4.9 were mixed and incubated at either  
440 room temperature, 56 °C, or 59 °C for 10 minutes and then chilled on ice for 2 minutes. Reaction  
441 mixes were then made to 5 µM SYTO9, 150X SYPRO orange, and ramped from 25 to 95°C, with  
442 fluorescence reads taken at 1°C intervals every 30 s within the Stratagene MX3005p quantitative-PCR  
443 (qPCR) system.

444

#### 445 **Preparation of liposomes**

446 Liposomes comprising of phosphatidic acid, phosphatidylcholine, cholesterol and rhodamine-labelled  
447 phosphatidylethanolamine (Avanti Polar Lipids) (molar ratios 44.5:44.5:10:1 respectively) were  
448 prepared as previously described (6) by rehydration of dried lipid films in 107 mM NaCl, 10 mM Hepes  
449 pH 7.5 and extrusion through 400 nm pore-size membranes using a mini-extruder (Avanti Polar Lipids).  
450 The lipid concentration of liposome preparations was estimated by comparing the level of rhodamine  
451 fluorescence in the liposome sample relative to samples of rehydrated lipids of known concentration.  
452 The expected diameter (average 400 nm) and size distribution of liposomes was confirmed by dynamic  
453 light scattering (Malvern Zetasizer µV). Liposomes containing carboxy-fluorescein (CF) (Sigma) were  
454 prepared by rehydrating lipids in the presence of 50 mM CF, 10 mM Hepes pH 7.5. Liposomes  
455 containing FITC-conjugated dextrans (FD; Sigma) were prepared by rehydrating lipids in the presence  
456 of 25 mg/ml FD, 107 mM NaCl, 10 mM Hepes pH 7.5. Liposomes containing CF or FD were purified

457 from external fluorescence by multiple cycles of ultracentrifugation (1) and resuspended in 107 mM  
458 NaCl, 10 mM Hepes pH 7.0 or 0.1M Citric acid 0.2M Sodium phosphate pH 7, 6.2, 5.9, 5.6, 5.0 or 4.9.

#### 459 **Membrane permeability assays**

460 Membrane permeability was measured by detecting the release of fluorescent material from within  
461 liposomes. Purified liposomes containing CF or FD were added to test substances (peptide, virus or  
462 mock controls in typical volume 5  $\mu$ l) to give typical final concentrations of 50  $\mu$ M lipid, 107 mM NaCl,  
463 10 mM HEPES pH 7.4 or 0.1M Citric acid 0.2M Sodium phosphate pH 7.0, 6.2, 5.9, 5.6, 5.0 or 4.9 and  
464 total volume of 100  $\mu$ l. Reagents and plastic-ware were pre-equilibrated to the reaction temperature  
465 (25°C or 37°C).

466 For CF release, reactions were assembled in 96-well plates and membrane permeability detected in real  
467 time by the release, dequenching and increase in fluorescence of CF. Measurements were recorded  
468 every 30 s for 1 hr using a fluorescence plate reader with excitation and emission wavelengths of 485  
469 nm and 520 nm respectively (Plate CHAMELEON V, Hidex). Initial rates were calculated from the  
470 linear slope of lines generated from the initial four data points.

471 For experiments investigating the effect of pH on the induction of membrane permeability, CF release  
472 reactions were assembled with 0.1M Citric acid 0.2M Sodium phosphate pH 7.0, 6.2, 5.9, 5.6, 5.0  
473 (instead of HEPES). CF fluorescence is quenched at low pH. As low pH quenches CF fluorescence the  
474 values were calculated as a percentage of full release by normalising to untreated liposomes (0%  
475 release) and 0.1% NP40 (100% release).

476 FD release reactions were assembled with 10 mM citric acid and 10 mM sodium phosphate at pH 5 and  
477 pH 7. Reactions were incubated for 1 hr, liposomes pelleted at 100,000 $\times$  g for 30 mins and pH of  
478 supernatant was neutralised by addition of a 2.5 M Tris pH 7.5 buffer. Fluorescent signal in the  
479 supernatant was measured using the plate reader as above. The signal pelleted liposomes signal was  
480 then released by the addition triton to calculate a 100% release signal.

481

482

#### 483 **Acknowledgments**

484

485 We would like to thank Prof David Stuart and Dr Elizabeth Fry at University of Oxford for the kind gift  
486 of AiV.

487



488 **Figure Legends**

489

490 **Figure 1 Inhibition of endosomal acidification interferes with an early step in the AiV life cycle.**

491 a) Growth of AiV is prevented by treatment of cells with NH<sub>4</sub>Cl: Titre of virus 24 hours post infection  
492 of cells treated without, or with 2 mM, 10 mM, 20 mM or 40 mM NH<sub>4</sub>Cl for 2 hours before infection  
493 with AiV at MOI 1. b) Time of addition of NH<sub>4</sub>Cl shows effect early in infection: Titre of virus 24  
494 hours post infection of cells treated with 40 mM NH<sub>4</sub>Cl 1 hour before infection (-1) or 0, 1, 2, 3, 4  
495 hours post infection. Experiments were performed in triplicate.

496

497 **Figure 2 Low pH enhances AiV capsid alterations.**

498 AiV analysed by PaSTRy over a range of pH values (pH 7.0, 6.2, 5.9, 5.6, 5.0 and 4.9) with  
499 incremental increases of temperature of 1°C every 30 seconds. Experiments were either put in at room  
500 temperature (a,d) or heated at either 56 °C (b,e) or 59 °C (c,f) for 10 mins and then chilled on ice for 2  
501 minutes prior to being put on the Stratagene MX3005p quantitative-PCR (qPCR) system. a-c)  
502 Relative fluorescence of SYTO9 nucleic acid-binding dye, where increasing signal infers exposure of  
503 viral RNA; d-e) Relative fluorescence of SYPRO orange hydrophobic protein residue-binding dye,  
504 where increasing signal infers exposure of hydrophobic capsid components. All results are normalised  
505 to maximum signal for each experiment, representing 100% signal. All experiments were performed  
506 in triplicate, this is a representative trace.

507

508 **Figure 3 AiV-induced membrane permeability is enhanced by low pH.**

509 a) Permeability assay showing CF released from liposomes after mixing with AiV at pH 7.0, 6.2, 5.9,  
510 5.6, 5.0 and 4.9. CF was detected by fluorescence measurements (excitation 492 nm/emission 512  
511 nm) recorded every 30 seconds for 1 hour. b) End points of AiV induced membrane permeability.  
512 Data in panel a was normalised to the maximum signal induced by 0.1% NP40 at each pH value. c-d  
513 FD released after addition of 1 µg of purified AiV capsid liposomes containing FD of 4 kD (FD4), 10  
514 kD (FD10), 70 kD (FD70) or 250 kD (FD250) at pH 7 (c) and pH 5 (d). Experiments were performed  
515 in triplicate and error is measured by s.e.m, \* = p ≥ 0.01. Low pH is known to quench CF dye so all  
516 results are normalised to 100% release as determined by incubation by NP40 and 0% release as  
517 determined by liposome incubated alone. As low pH quenches CF/FITC fluorescence, the values were  
518 calculated as a percentage of full release by normalising to untreated liposomes (0% release) and  
519 0.1% NP40 or triton (100% release).

520

521 **Figure 4 Alignments of VP4 and VP0 encoding picornavirus sequences**

522 Alignments of picornavirus VP4 sequences (a) VP0 sequences (b) was carried out using the MUSCLE  
523 sequence alignment tool (56). The amino acids are coloured using the Zappo colour scheme as  
524 follows: aliphatic/ hydrophobic (pale pink), aromatic (orange), positively charged (purple), negatively  
525 charged (red), hydrophilic (green), conformationally special (magenta) and cysteine residues (yellow).  
526 Mention the new boxes. Peptide sequences regions for AiV, LV and RV are highlighted with a black  
527 box.

528

529 **Figure 5 AiV VP0 N-terminal peptide is able to permeabilise membranes and form a size**  
530 **selective pore.**

531 Permeability assays showing CF or fluorescent dextrans (FD) released from liposomes after mixing  
532 with peptides. CF or FD was detected by fluorescence measurements (excitation 492 nm/emission 512  
533 nm) and displayed as % of total release by detergent induced lysis. Assays were carried out at pH 7.0  
534 unless otherwise stated.

535 a) CF release over time after addition of peptide AiV-VP0-N50 at concentrations of 0.5  $\mu$ M, 5  $\mu$ M, 14  
536  $\mu$ M. b) CF release over time after addition of peptide Ijungan virus (LV) LV-VP0-N50 at concentrations  
537 of 0.5  $\mu$ M, 5  $\mu$ M, 14  $\mu$ M and 50  $\mu$ M. c) CF release over time after addition of peptides AiV-VP0-N50  
538 or RV16-VP4-N45 at concentrations of 5  $\mu$ M. d) FD released after addition of 5  $\mu$ M peptide AiV VP0  
539 N50 to liposomes containing FD of 4 kD (FD4), 10 kD (FD10), 70 kD (FD70) or 250 kD (FD250). e)  
540 FD released after addition of 5  $\mu$ M peptide RV16 VP4 N45 to liposomes containing FD of 4 kD (FD4),  
541 10 kD (FD10), 70 kD (FD70) or 250 kD (FD250). f) CF release over time after addition of 0.5  $\mu$ M  
542 peptide AiV-VP0-N50 at pH 5 or pH 7. All experiments were performed in triplicate and error is  
543 measured by s.e.m, \* =  $p \geq 0.01$ . As low pH quenches CF/FITC fluorescence the values were calculated  
544 as a percentage of full release by normalising to untreated liposomes (0% release) and 0.1% NP40 or  
545 triton (100% release). In FITC reactions pH of supernatant was neutralised by addition of a 2.5 M Tris  
546 pH 7.5 buffer.

547 AiV-VP0-50N: GNSVTNIYGNGNNVTTDVGANGWAPT VSTGLGDGPVSASADSLPGRSGGA,  
548 LV-VP0-50N: MAASKMNPVGNLLSTVSSTVGSLLQNPSVEEKEMDSRVAASTTTNAGNL,  
549 RV16-VP4-45N: MGAQVSRQNVGTHSTQNMVSNNGSSINYFNINYFKDAASSGASRLD.

## 550 References

551

- 552 1. Davis MP, Bottley G, Beales LP, Killington R a, Rowlands DJ, Tuthill TJ. 2008. Recombinant  
553 VP4 of human rhinovirus induces permeability in model membranes. *J Virol* 82:4169–4174.
- 554 2. Panjwani A, Strauss M, Gold S, Wenham H, Jackson T, Chou JJ, Rowlands DJ, Stonehouse  
555 NJ, Hogle JM, Tuthill TJ. 2014. Capsid Protein VP4 of Human Rhinovirus Induces Membrane  
556 Permeability by the Formation of a Size-Selective Multimeric Pore. *PLoS Pathog*  
557 10:e1004294.
- 558 3. Shukla A, Padhi AK, Gomes J, Banerjee M. 2014. The VP4 Peptide of Hepatitis A Virus  
559 Ruptures Membranes through Formation of Discrete Pores. *J Virol* 88:12409–12421.
- 560 4. Sánchez-Eugenia R, Goikolea J, Gil-Cartón D, Sánchez-Magraner L, Guérin DMA. 2015.  
561 Triatoma Virus Recombinant VP4 Protein Induces Membrane Permeability through Dynamic  
562 Pores. *J Virol* 89:4645–4654.
- 563 5. Danthi P, Tosteson M, Li Q-H, Chow M. 2003. Genome delivery and ion channel properties  
564 are altered in VP4 mutants of poliovirus. *J Virol* 77:5266–5274.
- 565 6. Tuthill TJ, Bubeck D, Rowlands DJ, Hogle JM. 2006. Characterization of Early Steps in the  
566 Poliovirus Infection Process : Receptor-Decorated Liposomes Induce Conversion of the Virus  
567 to Particles Characterization of Early Steps in the Poliovirus Infection Process : Receptor-  
568 Decorated Liposomes Induce Conver. *J Virol* 80:172–180.
- 569 7. Panjwani A, Asfor AS, Tuthill TJ. 2016. The conserved N-terminus of human rhinovirus  
570 capsid protein VP4 contains membrane pore-forming activity and is a target for neutralizing  
571 antibodies. *J Gen Virol* 97:3238–3242.
- 572 8. Rossmann MG, Arnold E, Erickson JW, Frankenberger EA, Griffith JP, Hecht HJ, Johnson JE,  
573 Kamer G, Luo M, Mosser AG. 1985. Structure of a human common cold virus and functional  
574 relationship to other picornaviruses. *Nature* 317:145–53.
- 575 9. Arnold E, Luo M, Vriend G, Rossmann MG, Palmenberg AC, Parks GD, Nicklin MJ,  
576 Wimmer E. 1987. Implications of the picornavirus capsid structure for polyprotein processing.  
577 *Proc Natl Acad Sci U S A* 84:21–5.
- 578 10. Hogle JM, Chow M, Filman DJ. 1985. Three-dimensional structure of poliovirus at 2.9 Å  
579 resolution. *Science* 229:1358–1365.
- 580 11. Zhang Q, Hu R, Tang X, Wu C, He Q, Zhao Z, Chen H, Wu B. 2013. Occurrence and  
581 investigation of enteric viral infections in pigs with diarrhea in China. *Arch Virol* 158:1631–  
582 1636.
- 583 12. Yamashita T, Ito M, Kabashima Y, Tsuzuki H, Fujiura A, Sakae K. 2003. Isolation and  
584 characterization of a new species of kobuvirus associated with cattle. *J Gen Virol* 84:3069–  
585 3077.
- 586 13. Carmona-Vicente N, Buesa J, Brown PA, Merga JY, Darby AC, Stavisky J, Sadler L, Gaskell  
587 RM, Dawson S, Radford AD. 2013. Phylogeny and prevalence of kobuviruses in dogs and cats  
588 in the UK. *Vet Microbiol* 164:246–252.
- 589 14. Bergallo M, Galliano I, Montanari P, Rassa M, Daprà V. 2018. Aichivirus in Children with  
590 Diarrhea in Northern Italy. *Intervirology* 60:196–200.
- 591 15. Sdiri-Loulizi K, Hassine M, Bour JB, Ambert-Balay K, Mastouri M, Aho LS, Gharbi-Khelifi  
592 H, Aouni Z, Sakly N, Chouchane S, Neji-Guédiche M, Pothier P, Aouni M. 2010. Aichi virus  
593 IgG seroprevalence in Tunisia parallels genomic detection and clinical presentation in children

- 594 with gastroenteritis. *Clin Vaccine Immunol* 17:1111–1116.
- 595 16. Yamashita T, Sakae K, Ishihara Y, Isomura S, Utagawa E. 1993. Prevalence of newly isolated,  
596 cytopathic small round virus (Aichi strain) in Japan. *J Clin Microbiol* 31:2938–2943.
- 597 17. Oh D-Y, Silva PA, Hauroeder B, Diedrich S, Cardoso DDP, Schreier E. 2006. Molecular  
598 characterization of the first Aichi viruses isolated in Europe and in South America. *Arch Virol*  
599 151:1199–1206.
- 600 18. Reuter G, Boros A, Pankovics P. 2011. Kobuviruses - a comprehensive review. *Rev Med Virol*  
601 21:32–41.
- 602 19. Rivadulla E, Romalde JL. 2020. A Comprehensive Review on Human Aichi Virus. *Virol Sin*  
603 35:501–516.
- 604 20. Kitajima M, Gerba C. 2015. Aichi Virus 1: Environmental Occurrence and Behavior.  
605 *Pathogens* 4:256–268.
- 606 21. Tuthill TJ, GropPELLI E, Hogle JM, Rowlands DJ. 2010. Picornaviruses. *Curr Top Microbiol*  
607 *Immunol* 343:43–89.
- 608 22. Stanway G, Kalkkinen N, Roivainen M, Ghazi F, Khan M, Smyth M, Meurman O, Hyypiä T.  
609 1994. Molecular and biological characteristics of echovirus 22, a representative of a new  
610 picornavirus group. *J Virol* 68:8232–8.
- 611 23. Yamashita T, Kobayashi S, Sakae K, Nakata S, Chiba S, Ishihara Y, Isomura S. 1991.  
612 Isolation of cytopathic small round viruses with BS-C-1 cells from patients with  
613 gastroenteritis. *J Infect Dis* 164:954–957.
- 614 24. Ansardi DC, Porter DC, Morrow CD. 1992. Myristylation of poliovirus capsid precursor P1 is  
615 required for assembly of subviral particles. *J Virol* 66:4556–4563.
- 616 25. Marc D, Drugeon ' G, Haenni l A-L, Girard M, Van Der Werf S. 1989. Role of myristoylation  
617 of poliovirus capsid protein VP4 as determined by site-directed mutagenesis of its N-terminal  
618 sequence. *EMBO J* 8:2661–2668.
- 619 26. Goodwin S, Tuthill TJ, Arias A, Killington RA, Rowlands DJ. 2009. Foot-and-Mouth Disease  
620 Virus Assembly: Processing of Recombinant Capsid Precursor by Exogenous Protease Induces  
621 Self-Assembly of Pentamers In Vitro in a Myristoylation-Dependent Manner. *J Virol*  
622 83:11275–11282.
- 623 27. Mousnier A, Bell AS, Swieboda DP, Morales-Sanfrutos J, Perez-Dorado I, Brannigan JA,  
624 Newman J, Ritzefeld M, Hutton JA, Guedan A, Asfor AS, Robinson SW, Hopkins-Navratilova  
625 I, Wilkinson AJ, Johnston SL, Leatherbarrow RJ, Tuthill TJ, Solari R, Tate EW. 2018.  
626 Fragment-derived inhibitors of human N-myristoyltransferase block capsid assembly and  
627 replication of the common cold virus. *Nat Chem* 10:599–606.
- 628 28. Corbic Ramljak I, Stanger J, Real-Hohn A, Dreier D, Wimmer L, Redlberger-Fritz M, Fischl  
629 W, Klingel K, Mihovilovic MD, Blaas D, Kowalski H. 2018. Cellular N-myristoyltransferases  
630 play a crucial picornavirus genus-specific role in viral assembly, virion maturation, and  
631 infectivity. *PLoS Pathogens*.
- 632 29. Wang X, Peng W, Ren J, Hu Z, Xu J, Lou Z, Li X, Yin W, Shen X, Porta C, Walter TS, Evans  
633 G, Axford D, Owen R, Rowlands DJ, Wang J, Stuart DI, Fry EE, Rao Z. 2012. A sensor-  
634 adaptor mechanism for enterovirus uncoating from structures of EV71. *Nat Struct Mol Biol*  
635 19:424–9.
- 636 30. Fricks CE, Hogle JM. 1990. Cell-induced conformational change in poliovirus: externalization  
637 of the amino terminus of VP1 is responsible for liposome binding. *J Virol* 64:1934–45.
- 638 31. Bostina M, Levy H, Filman DJ, Hogle JM. 2011. Poliovirus RNA is released from the capsid

- 639 near a twofold symmetry axis. *J Virol* 85:776–83.
- 640 32. Shingler KL, Yoder JL, Carnegie MS, Ashley RE, Makhov AM, Conway JF, Hafenstein S.  
641 2013. The Enterovirus 71 A-particle Forms a Gateway to Allow Genome Release: A CryoEM  
642 Study of Picornavirus Uncoating. *PLoS Pathog* 9:e1003240.
- 643 33. Levy HC, Bostina M, Filman DJ, Hogle JM. 2010. Catching a virus in the act of RNA release:  
644 a novel poliovirus uncoating intermediate characterized by cryo-electron microscopy. *J Virol*  
645 84:4426–41.
- 646 34. Ren J, Wang X, Hu Z, Gao Q, Sun Y, Li X, Porta C, Walter TS, Gilbert RJ, Zhao Y, Axford  
647 D, Williams M, Mcauley K, Rowlands DJ, Yin W, Wang J, Stuart DI, Rao Z, Fry EE. 2013.  
648 Picornavirus uncoating intermediate captured in atomic detail. *Nat Commun* 4:1927–1929.
- 649 35. Seitsonen JJT, Shakeel S, Susi P, Arun P, Sinkovits RS, Hyvönen H, Ylä-pelto J, Topf M,  
650 Hyypiä T, Butcher SJ, Pandurangan AP, Laurinmäki P. 2012. Structural Analysis of  
651 Coxsackievirus A7 Reveals Conformational Changes Associated with Uncoating. *J Virol*  
652 86:7207–7215.
- 653 36. Garriga D, Pickl-Herk A, Luque D, Wruss J, Castón JR, Blaas D, Verdaguer N. 2012. Insights  
654 into Minor Group Rhinovirus Uncoating: The X-ray Structure of the HRV2 Empty Capsid.  
655 *PLOS Pathog* 8:e1002473.
- 656 37. Lyu K, Ding J, Han J-F, Zhang Y, Wu X-Y, He Y-L, Qin C-F, Chen R. 2014. Human  
657 Enterovirus 71 Uncoating Captured at Atomic Resolution. *J Virol* 88:3114–3126.
- 658 38. Tuthill TJ, Harlos K, Walter TS, Knowles NJ, GropPELLI E, David J, Stuart DI, Fry EE. 2009.  
659 Equine Rhinitis A Virus and Its Low pH Empty Particle : Clues Towards an Aphthovirus Entry  
660 Mechanism ? *PLoS Pathog* 5:e1000620.
- 661 39. Malik N, Kotecha A, Gold S, Asfor A, Ren J, Huiskonen JT, Tuthill TJ, Fry EE, Stuart DI.  
662 2017. Structures of foot and mouth disease virus pentamers: Insight into capsid dissociation  
663 and unexpected pentamer reassociation. *PLoS Pathog* 13:1–15.
- 664 40. GropPELLI E, Tuthill TJ, Rowlands DJ. 2010. Cell entry of the aphthovirus equine rhinitis A  
665 virus is dependent on endosome acidification. *J Virol* 84:6235–6240.
- 666 41. Nurani G, Lindqvist B, Casasnovas JM. 2003. Receptor priming of major group human  
667 rhinoviruses for uncoating and entry at mild low-pH environments. *J Virol* 77:11985–11991.
- 668 42. Newman JF, Rowlands DJ, Brown F. 1973. A physico-chemical sub-grouping of the  
669 mammalian picornaviruses. *J Gen Virol* 18:171–180.
- 670 43. Curry S, Abrams CC, Fry E, Crowther JC, Belsham GJ, Stuart DI, King AM. 1995. Viral RNA  
671 modulates the acid sensitivity of foot-and-mouth disease virus capsids. *J Virol* 69:430–438.
- 672 44. Zhu L, Wang X, Ren J, Kotecha A, Walter TS, Yuan S, Yamashita T, Tuthill TJ, Fry EE, Rao  
673 Z, Stuart DI. 2016. Structure of human Aichi virus and implications for receptor binding. *Nat*  
674 *Microbiol* 1:16150.
- 675 45. Katpally U, Fu T-M, Freed DC, Casimiro DR, Smith TJ. 2009. Antibodies to the Buried N  
676 Terminus of Rhinovirus VP4 Exhibit Cross-Serotypic Neutralization. *J Virol* 83:7040–7048.
- 677 46. Strauss M, Levy HC, Bostina M, Filman DJ, Hogle JM. 2013. RNA transfer from poliovirus  
678 135S particles across membranes is mediated by long umbilical connectors. *J Virol* 87:3903–  
679 14.
- 680 47. Li Q, Yafal a G, Lee YM, Hogle J, Chow M. 1994. Poliovirus neutralization by antibodies to  
681 internal epitopes of VP4 and VP1 results from reversible exposure of these sequences at  
682 physiological temperature. *J Virol* 68:3965–3970.

- 683 48. Gropelli E, Levy HC, Sun E, Strauss M, Nicol C, Gold S, Zhuang X, Tuthill TJ, Hogle JM,  
684 Rowlands DJ. 2017. Picornavirus RNA is protected from cleavage by ribonuclease during  
685 virion uncoating and transfer across cellular and model membranes. *PLoS Pathog* 13:1–21.
- 686 49. Mullanpudi E, Nováček J, Pálková L, Kulich P, Lindberg AM, van Kuppeveld FJM, Plevka P.  
687 2016. Structure and Genome Release Mechanism of the Human Cardiovirus Saffold Virus 3. *J*  
688 *Viro* 90:7628–7639.
- 689 50. Sabin C, Füzik T, Škubník K, Pálková L, Lindberg AM, Plevka P. 2016. Structure of Aichi  
690 virus 1 and its empty particle: clues towards kobuvirus genome release mechanism. *J Viro*  
691 90:10800–10810.
- 692 51. Zhu L, Wang X, Ren J, Kotecha A, Walter TS, Yuan S, Yamashita T, Tuthill TJ, Fry EE, Rao  
693 Z, Stuart DI. 2016. Structure of human Aichi virus and implications for receptor binding. *Nat*  
694 *Microbiol* 1:16150.
- 695 52. De Colibus L, Wang X, Spyrou J a B, Kelly J, Ren J, Grimes J, Puerstinger G, Stonehouse N,  
696 Walter TS, Hu Z, Wang J, Li X, Peng W, Rowlands DJ, Fry EE, Rao Z, Stuart DI. 2014.  
697 More-powerful virus inhibitors from structure-based analysis of HEV71 capsid-binding  
698 molecules. *Nat Struct Mol Biol* 21:282–8.
- 699 53. Walter TS, Ren J, Tuthill TJ, Rowlands DJ, Stuart DI, Fry EE. 2012. A plate-based high-  
700 throughput assay for virus stability and vaccine formulation. *J Viro* Methods 185:166–170.
- 701 54. Adeyemi OO, Nicol C, Stonehouse NJ, Rowlands DJ. 2017. Increasing Type 1 Poliovirus  
702 Capsid Stability by Thermal Selection. *J Viro* 91:e01586-16.
- 703 55. Kotecha A, Zhang F, Juleff N, Jackson T, Perez E, Stuart D, Fry E, Charleston B, Seago J.  
704 2016. Application of the thermofluor PaSTRy technique for improving foot-and-mouth disease  
705 virus vaccine formulation. *J Gen Viro* 97:1557–1565.
- 706 56. Edgar RC. 2004. MUSCLE: Multiple sequence alignment with high accuracy and high  
707 throughput. *Nucleic Acids Res* 32:1792–1797.

708

Figure 1 A-B

A

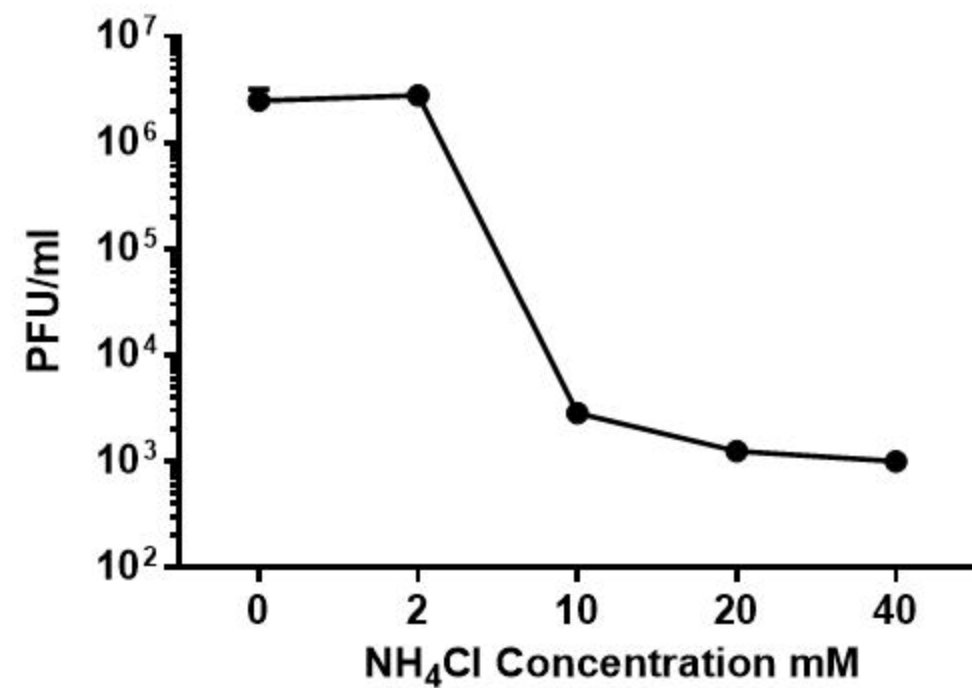

B

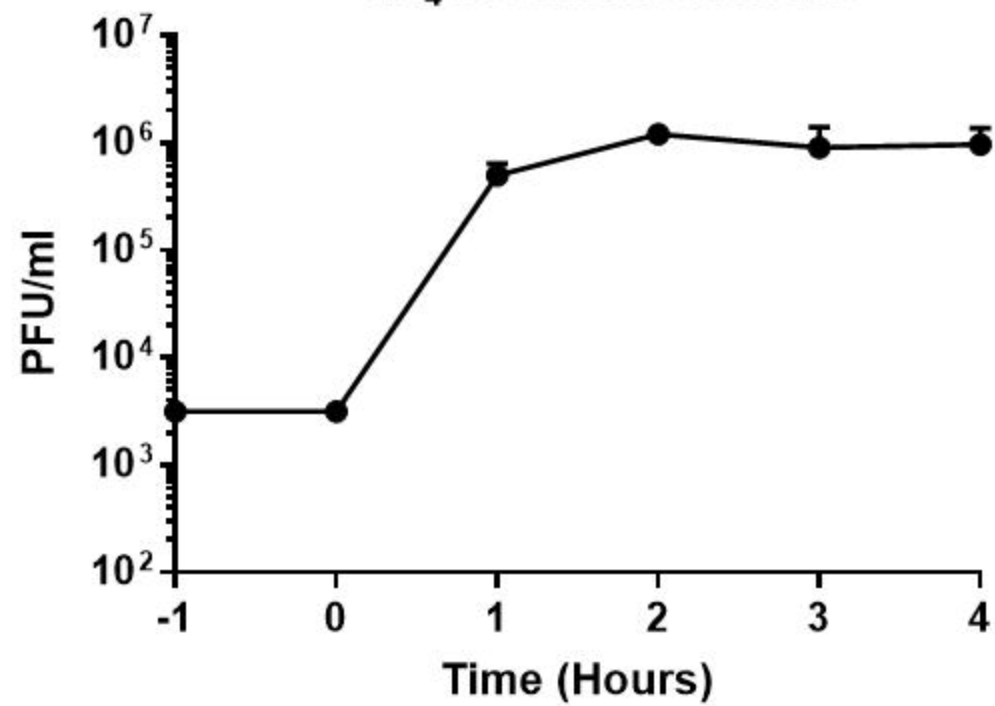



Figure 2 A-B

A

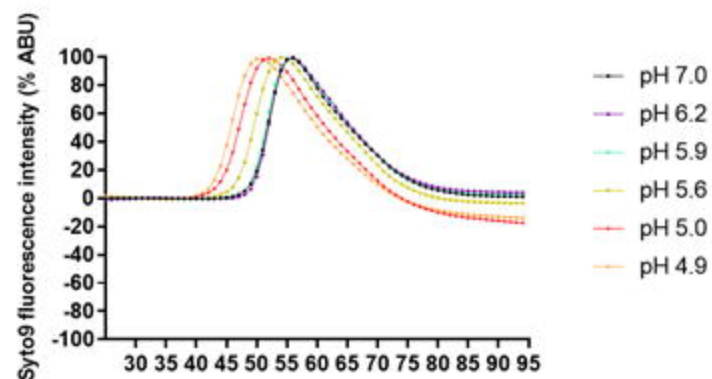

B

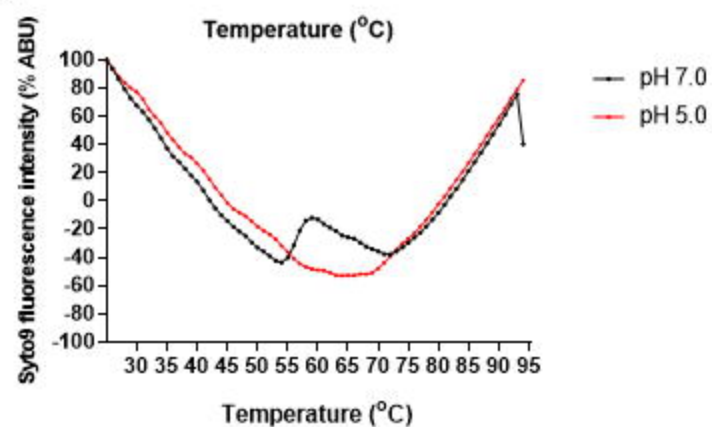

C

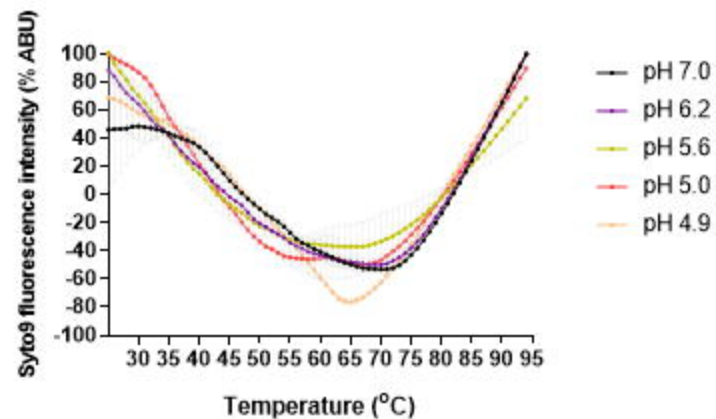

D

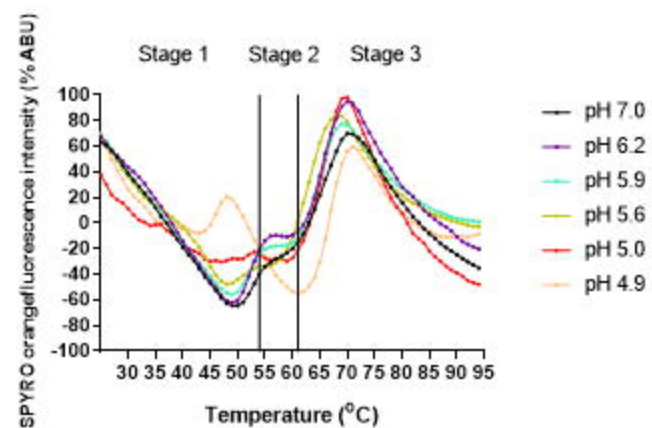

E

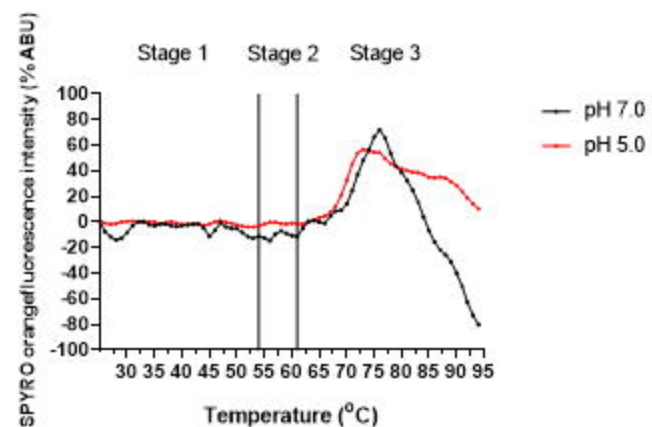

F

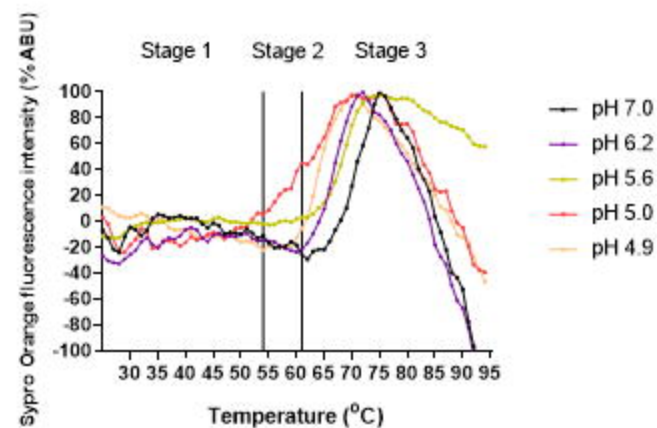



Figure 3 A-D

A

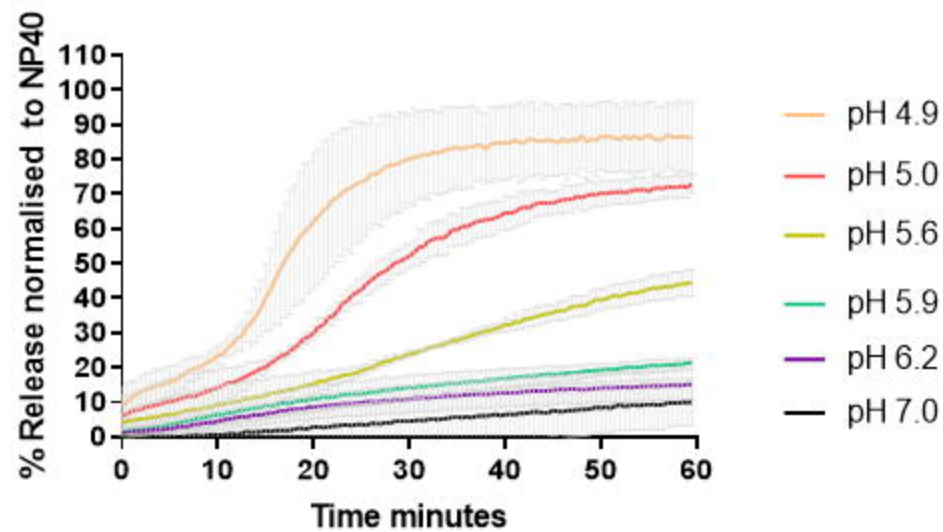

B

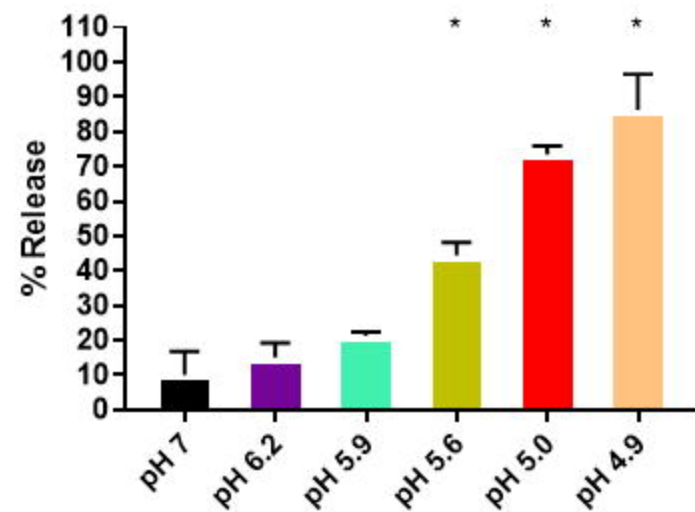

C

pH 7

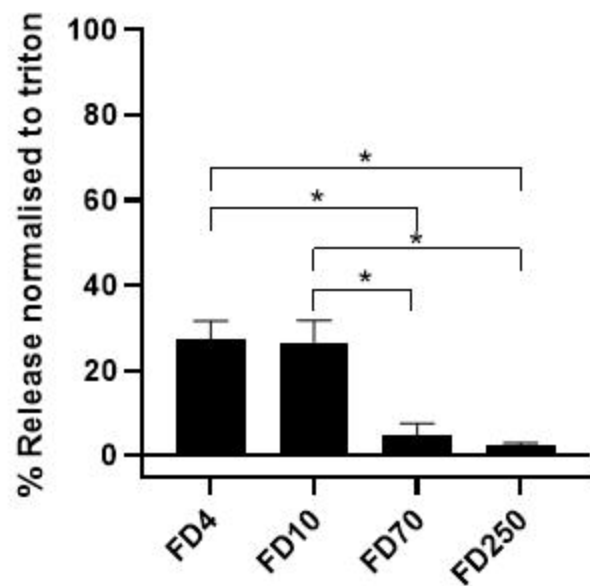

D

pH 5

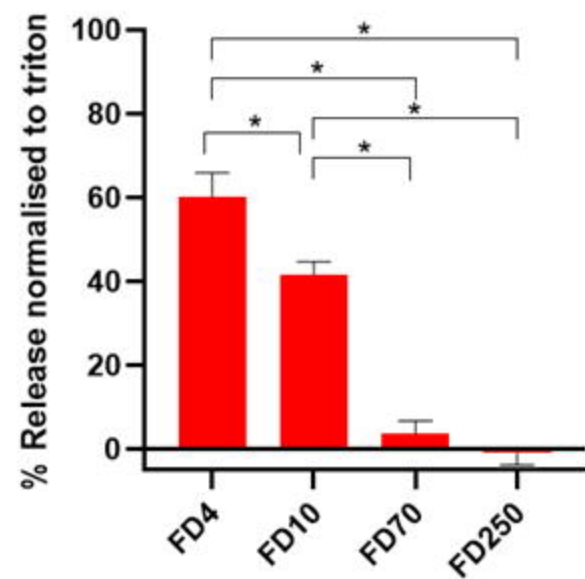

Figure 4 A

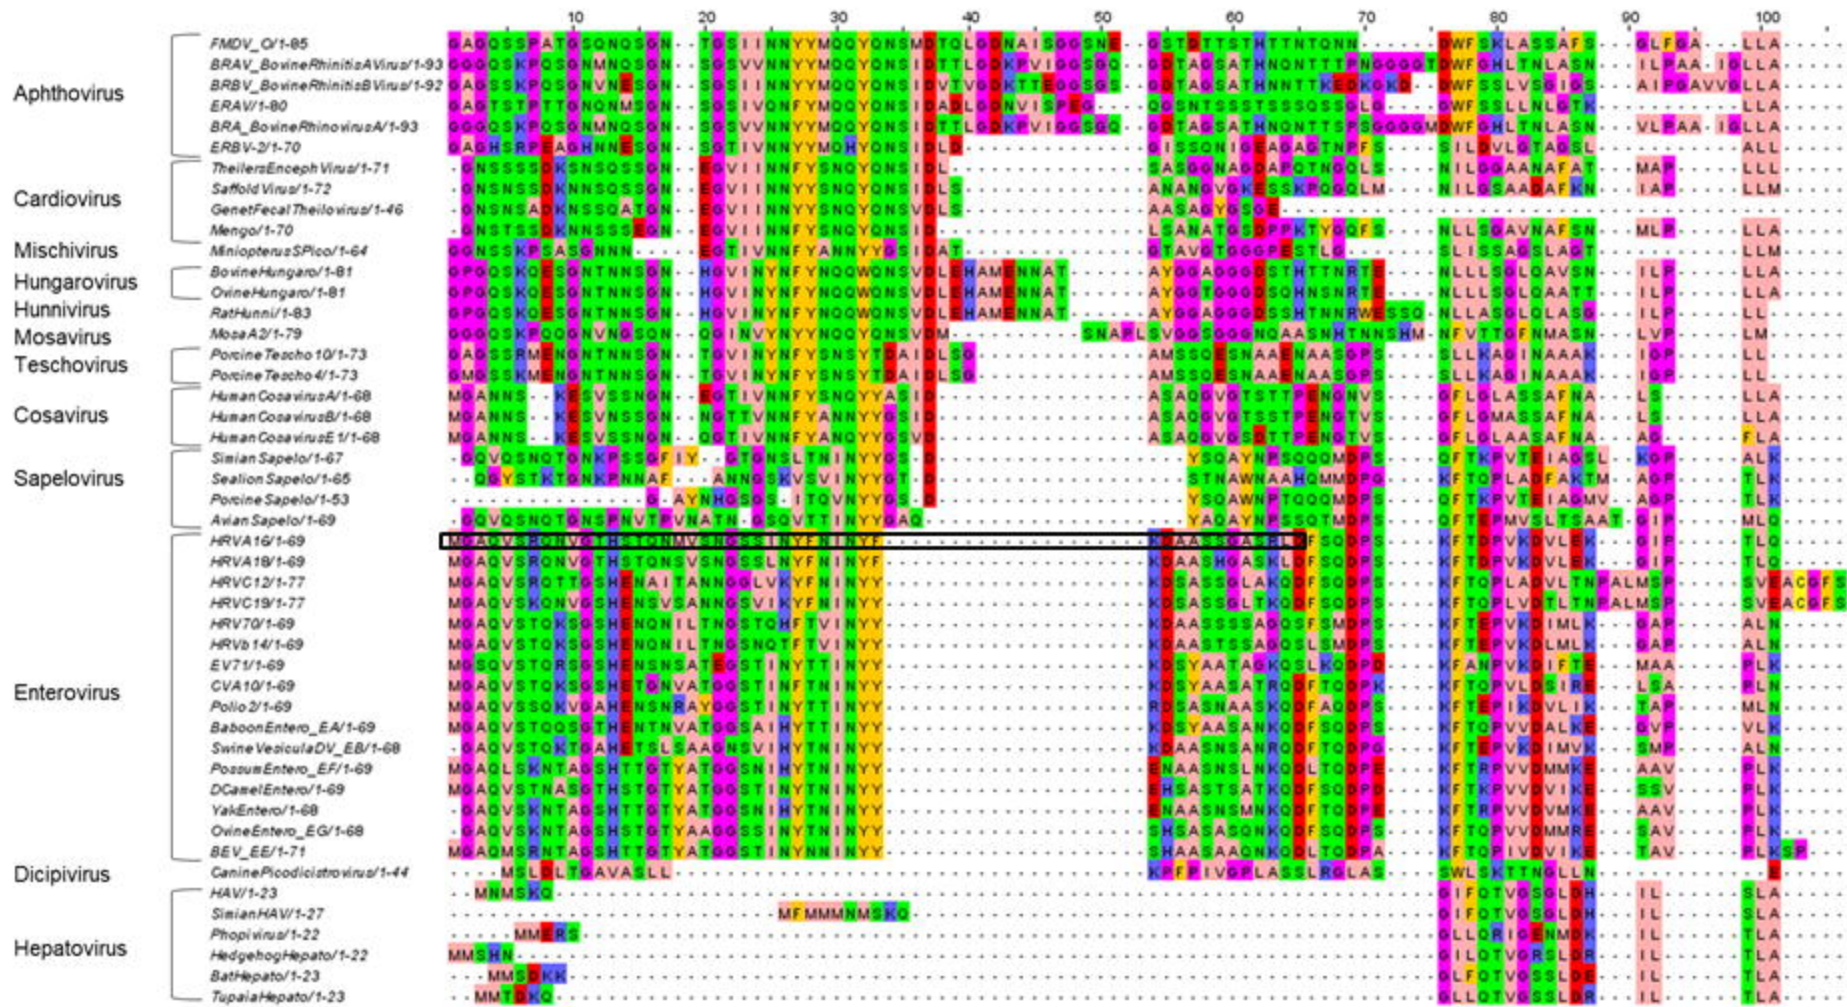





Figure 5 A-F

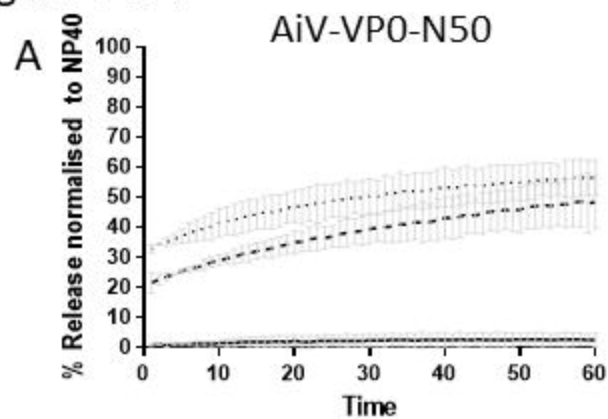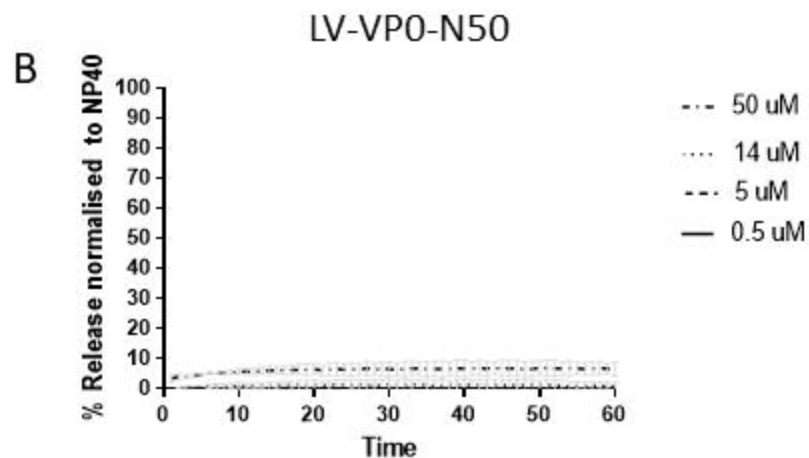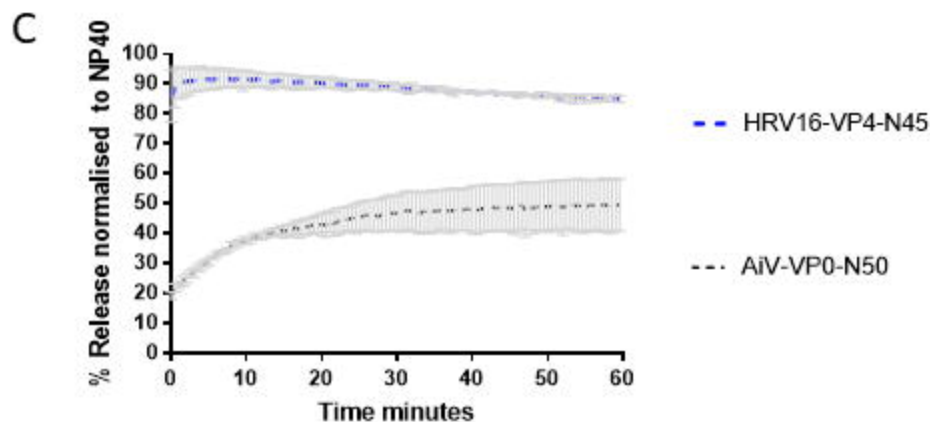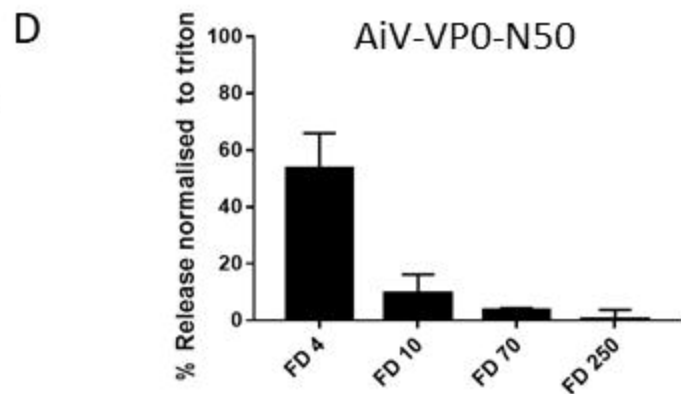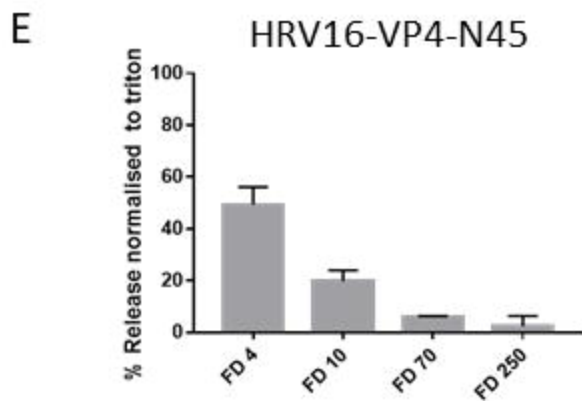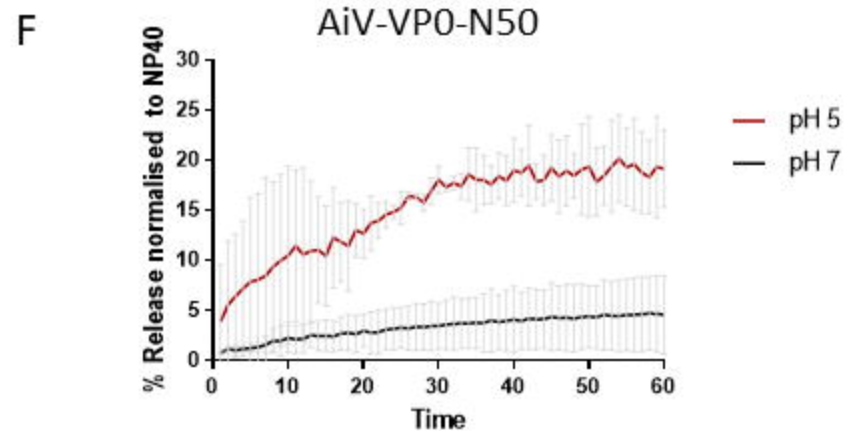

Source: http://biorxiv.org/content/10.1101/2022.01.10.475380v1.full.pdf
